# Supplementary material for: Simplex and Multiplex Stratification in ASD and ADHD Families: A Promising Approach for Identifying Overlapping and Unique Underpinnings of ASD and ADHD?
Source: Springer Nature journal article supplement (doi:10.1007/s10803-014-2220-9), 2014-08-30
Supplement: MOESM1 [file 558942]

| **SUPPLEMENTARY TABLE 1**. Means, and standard deviations (sd’s) of the normalized dependent variables for the ASD and ADHD simplex and multiplex probands, unaffected siblings, and parents compared to controls | | | | | | | | | | | | | | | |
| --- | --- | --- | --- | --- | --- | --- | --- | --- | --- | --- | --- | --- | --- | --- | --- |
|  | | Controls (c) |  | ASD cohort | | | |  | ADHD cohort | | | |  | Group contrasts  ASD  versus controls based on  *p*-values < .05 | Group contrasts  ADHD versus controls based on  *p*-values < .05 | |
|  | |  |  | Simplex families | | Multiplex families | |  | Simplex families | | Multiplex families | |  |
|  | |  |  | 1.Affected probands | 2.Unaffec-ted siblings | 3.Affected probands | 4. Unaffec-ted siblings |  | 5.Affected probands | 6.Unaffec-ted siblings | 7.Affected probands | 8.Unaffec-ted siblings |  |
|  | |  |  | M (sd) | M (sd) | M (sd) | M (sd) |  | M (sd) | M (sd) | M (sd) | M (sd) |  |
| **Child data** | |  |  |  |  |  |  |  |  |  |  |  |  |  |  | |
| SCQ | Total Score | -.66 (.07) |  | 1.15 (.09) | -.69 (.08) | 1.29 (.08) | -.18 (.09) |  | .43 (.14) | -.57 (.12) | .11 (.05) | -.36 (.06) |  | 1=3>4>2=c | 5=7>6=8/ 6=c, 8>c | |
| Social interaction | -.64 (.07) |  | 1.02 (.09) | -.57 (.08) | 1.23 (.07) | -.09 (.09) |  | .37 (.13) | -.45 (.12) | .06 (.05) | -.31 (.07) |  | 1=3>4>2=c | 5=7>6=8/ 6=c, 8>c | |
| Communication | -.45 (.08) |  | .91 (.10) | -.63 (.09) | 1.00 (.09) | -.18 (.11) |  | .29 (.14) | -.34 (.13) | .16 (.06) | -.23 (.07) |  | 1=3>4>2=c | 5=7>6=8/ 6=c, 8>c | |
| Stereotypic behavior | -.32 (.07) |  | .96 (.09) | -.35 (.08) | 1.07 (.07) | -.19 (.09) |  | .13 (.12) | -.53 (.11) | .10 (.05) | -.38 (.06) |  | 1=3>2=4=c | 5=7>6=8=c | |
| CSBQ | ASD core scorea | -.66 (.04) |  | 1.27 (.12) | -.51 (.10) | 1.22 (.09) | .05 (.10) |  | .84 (.12) | -.27 (.10) | .66 (.05) | -.16 (.06) |  | 1=3>4>2=c | 5=7>6=8>c | |
| Tendency to withdraw | -.48 (.03) |  | 1.16 (.10) | -.25 (.09) | 1.30 (.08) | .08 (.10) |  | .61 (.13) | -.12 (.11) | .39 (.05) | -.16 (.06) |  | 1=3>4>2>c | 5=7>6=8>c | |
| Not understanding | -.62 (.04) |  | 1.02 (.10) | -.36 (.10) | 1.06 (.09) | .19 (.10) |  | .93 (.12) | -.22 (.10) | .69 (.04) | -.16 (.06) |  | 1=3>4>2>c | 5=7>6=8>c | |
| Stereotypic behavior | -.43 (.03) |  | .74 (.09) | -.33 (.08) | .73 (.07) | -.19 (.09) |  | .92 (.12) | -.19 (.11) | .67 (.05) | -.27 (.06) |  | 1=3>2=4, 2=c, 4>c | 5=7>6=8>c | |
| Fear of changes | -.35 (.03) |  | .66 (.09) | -.23 (.08) | .96 (.08) | .09 (.09) |  | .64 (.12) | -.21 (.10 | .49 (.04) | -.12 (.06) |  | 3>1>4>2=c | 5=7>6=8/ 6=c, 8>c | |
| CPRS | DSM-IV Combined | -.68 (.03) |  | .38 (.08) | -.38 (.07) | .56 (.07) | .07 (.09) |  | 1.02 (.11) | -.58 (.10) | .98 (.04) | -.44 (.06) |  | 1=3>4>2>c | 5=7>6=8/ 6=c, 8>c | |
| Inattentive | -.63 (.03) |  | . 38 (.09) | -.38 (.07) | .53 (.07) | .09 (.09) |  | .94 (.11) | -.57 (.09) | .93 (.04) | -.43 (.05) |  | 1=3>4>2>c | 5=7>6=8/ 6=c, 8>c | |
| Hyp/imp | -.62 (.04) |  | .45 (.08) | -.32 (.07) | .57 (.07) | .03 (.09) |  | 1.07 (.11) | -.53 (.09) | .95 (.04) | -.42 (.06) |  | 1=3>4>2>c | 5=7>6=8/ 6=c, 8>c | |
| CTRS | DSM-IV Combined | -.63 (.03) |  | .33 (.09) | -.27 (.07) | .43 (.08) | -.06 (.09) |  | 1.13 (.11) | -.38 (.09) | .95 (.04) | -.38 (.06) |  | 1=3>2=4>c | 5=7>6=8>c | |
| Inattentive | -.61 (.03) |  | .32 (.09) | -.17 (.08) | .36 (.07) | -.04 (.09) |  | 1.22 (.11) | -.31 (.10) | .95 (.04) | -.39 (.06) |  | 1=3>2=4>c | 5=7>6=8/ 6=c, 8>c | |
| Hyp/imp | -.53 (.03) |  | .26 (.09) | -.31 (.08) | .35 (.07) | -.09 (.09) |  | .99 (.12) | -.38 (.10) | .92 (.04) | -.36 (.06) |  | 1=3>2=4>c | 5=7>6=8/ 6=c, 8>c | |
|  |  |  |  |  |  |  |  |  |  |  |  |  |  |  |  | |
| **Parental data** | |  |  |  |  |  |  |  |  |  |  |  |  |  |  | |
| ASBQ | ASD Core score | -.34 (.06) |  | -b | -.02 (.12) | 1.49 (.14) | .28 (.14) |  | -b | -.07 (.15) | .46 (.08) | .04 (.08) |  | 3>2=4>c | 7>8>c,6=c, 6=8 | |
| Tendency to withdraw | -.24 (.05) |  | - | .12 (.10) | 1.35 (.13) | .31 (.12) |  | - | -.04 (.13) | .26 (.07) | .09 (.07) |  | 3>2=4>c | 7>8>c,6=c, 6=8 | |
| Not understanding | -.22 (.05) |  | - | -.12 (.10) | 1.23 (.14) | .25 (.13) |  | - | -.09 (.13) | .50 (.08) | .02 (.07) |  | 3=4>2=c | 7>6=8/ 6=c, 8>c | |
| Stereotypic behavior | -.08 (.04) |  | - | -.18 (.09) | .77 (.12) | .16 (.11) |  | - | .04 (.12) | .41 (.07) | .03 (.07) |  | 3>4>2=c | 7>6=8=c | |
| Fear of changes | -.14 (.04) |  | - | .02 (.08) | 1.14 (.11) | -.01 (.10) |  | - | .01 (.11) | .35 (.07) | .07 (.06) |  | 3>2=4=c | 7>8>c,6=c, 6=8 | |
| ADHD | DSM-IV Combined | -.59 (.08) |  | - | -.42 (.09) | .36 (.14) | -.16 (.11) |  | - | -.06 (.11) | 1.04 (.06) | -.17 (.06) |  | 3>4>c, 2=4, 2=c | 7>6=8>c | |
| Inattentive | -.53 (.08) |  | - | -.39 (.09) | .49 (.14) | -.21 (.10) |  | - | -.09 (.10) | .95 (.06) | -.14 (.06) |  | 3>4>c, 2=4, 2=c | 7>6=8>c | |
| Hyp/imp | -.48 (.08) |  | - | -.37 (.08) | .20 (.14) | -.15 (.10) |  | - | -.03 (.10) | .98 (.07) | -.21 (.06) |  | 3>4>c, 2=4, 2=c | 7>6=8>c | |
| ASD = Autism Spectrum Disorders; ADHD = Attention-Deficit/Hyperactivity Disorder; SCQ = Social Communication Questionnaire; CSBQ = Child Social Behavior Questionnaire; CPRS = Conners Parent Rating Scales; CTRS = Conners Teacher Rating Scales; Hyp/imp = Hyperactive/Impulsive; ASBQ = Adult Social Behavior Questionnaires; c = controls  athe ASD Core score is the combined total score of CSBQ/ASBQ subscales: tendency to withdraw, not understanding, stereotypic behavior and fear of changes  bby definition, no affected parents are present in SPX families | | | | | | | | | | | | | | | |
